# Supplementary material
Source: PubMed Central journal article supplement (PMC6945751)
Supplement: NIHMS1064973-supplement-1.pdf [file NIHMS1064973-supplement-1.pdf]

**Table S1. Sample Size by Fibrosis Stage\***

| CT (and Lab) Parameters             | Pathologic Fibrosis Stage (METAVIR) |         |         |         |          |
|-------------------------------------|-------------------------------------|---------|---------|---------|----------|
|                                     | F0                                  | F1      | F2      | F3      | F4       |
| <b>LSVR</b>                         | 49 (0)                              | 68 (1)  | 100 (2) | 72 (4)  | 165 (8)  |
| <b>Liver Volume</b>                 | 49 (0)                              | 68 (1)  | 100 (2) | 72 (4)  | 165 (8)  |
| <b>Splenic Volume</b>               | 48 (1)                              | 65 (4)  | 97 (5)  | 66 (10) | 161 (12) |
| <b>LSN Score</b>                    | 43 (6)                              | 55 (14) | 90 (12) | 66 (10) | 157 (16) |
| <b>Periportal Space</b>             | 49 (0)                              | 66 (3)  | 95 (7)  | 65 (11) | 150 (23) |
| <b>LPV/RPV Ratio</b>                | 49 (0)                              | 66 (3)  | 95 (7)  | 65 (11) | 148 (25) |
| <b>Texture (Mean<sub>PV2</sub>)</b> | 47 (2)                              | 63 (6)  | 97 (5)  | 69 (7)  | 150 (23) |
| <b>Texture (Skew<sub>PV6</sub>)</b> | 47 (2)                              | 63 (6)  | 97 (5)  | 69 (7)  | 150 (23) |
| <b>Texture (Kurt<sub>PV6</sub>)</b> | 47 (2)                              | 63 (6)  | 97 (5)  | 69 (7)  | 150 (23) |
| <b>APRI (Lab)</b>                   | 49 (0)                              | 66 (3)  | 97 (5)  | 76 (0)  | 172 (1)  |
| <b>FIB-4 (Lab)</b>                  | 46 (3)                              | 58 (11) | 79 (23) | 67 (9)  | 167 (6)  |

\*Missing values noted in parentheses

**Table S2. Median Values (IQR) for CT and Lab Parameters according to Fibrosis Stage\***

| CT (and Lab) Parameters             | Pathologic Fibrosis Stage (METAVIR) |            |            |            |             |
|-------------------------------------|-------------------------------------|------------|------------|------------|-------------|
|                                     | F0                                  | F1         | F2         | F3         | F4          |
| <b>LSVR</b>                         | 0.24 (0.1)                          | 0.23 (0.1) | 0.27 (0.1) | 0.32 (0.1) | 0.43 (0.2)  |
| <b>Liver Volume</b>                 | 1675 (424)                          | 1586 (410) | 1716 (522) | 1934 (510) | 1710 (784)  |
| <b>Splenic Volume</b>               | 241 (149)                           | 248 (134)  | 286 (189)  | 361 (347)  | 703 (551)   |
| <b>LSN Score</b>                    | 2.30 (0.4)                          | 2.30 (0.5) | 2.40 (0.5) | 2.75 (0.6) | 3.60 (1.3)  |
| <b>Periportal Space</b>             | 5 (3)                               | 6 (4)      | 7 (5)      | 7 (4)      | 10 (5)      |
| <b>LPV/RPV Ratio</b>                | 0.9 (0.2)                           | 0.9 (0.2)  | 0.9 (0.2)  | 0.9 (0.2)  | 0.9 (0.3)   |
| <b>Texture (Mean<sub>PV2</sub>)</b> | 0.1 (0.1)                           | 0.2 (0.2)  | 0.2 (0.3)  | 0.3 (0.3)  | 0.7 (0.8)   |
| <b>Texture (Skew<sub>PV6</sub>)</b> | 1.6 (1.1)                           | 1.8 (1.1)  | 1.6 (0.9)  | 1.6 (1.5)  | 1.1 (0.8)   |
| <b>Texture (Kurt<sub>PV6</sub>)</b> | 1.6 (1.1)                           | 2.2 (7.5)  | 1.9 (6.3)  | 1.9 (9.4)  | 1.2 (1.1)   |
| <b>APRI (Lab)</b>                   | 0.40 (0.4)                          | 0.45 (0.6) | 0.60 (0.7) | 0.70 (1.4) | 2.50 (3.2)  |
| <b>FIB-4 (Lab)</b>                  | 0.95 (0.7)                          | 1.10 (1.0) | 1.50 (1.7) | 1.90 (2.2) | 6.50 (6.75) |

\*All median values for each parameter differ by fibrosis category ( $p < 0.001$ ) except for the LPV/RPV ratio ( $p = 0.352$ )

**Table S3.** Univariate analysis of parameters for predicting liver fibrosis\*

| <b>LSVR</b>            |                             |                          |                            |                            |
|------------------------|-----------------------------|--------------------------|----------------------------|----------------------------|
| <b>Fibrosis Score*</b> | <b>ROC AUC<br/>(95% CI)</b> | <b>Cut-off<br/>Value</b> | <b>Sensitivity<br/>(%)</b> | <b>Specificity<br/>(%)</b> |
| <b>F0 vs. F1-F4</b>    | 0.711 (0.646-0.775)         | 0.295                    | 59.3                       | 75.5                       |
| <b>F0-1 vs. F2-4</b>   | 0.768 (0.722-0.813)         | 0.295                    | 68.0                       | 80.3                       |
| <b>F0-2 vs. F3-4</b>   | 0.805 (0.764-0.846)         | 0.345                    | 63.7                       | 86.6                       |
| <b>F0-3 vs. F4</b>     | 0.822 (0.779-0.865)         | 0.345                    | 74.5                       | 80.3                       |

  

| <b>Total liver volume</b> |                             |                          |                            |                            |
|---------------------------|-----------------------------|--------------------------|----------------------------|----------------------------|
| <b>Fibrosis Score</b>     | <b>ROC AUC<br/>(95% CI)</b> | <b>Cut-off<br/>Value</b> | <b>Sensitivity<br/>(%)</b> | <b>Specificity<br/>(%)</b> |
| <b>F0 vs. F1-F4</b>       | 0.558 (0.482-0.634)         | 2089.6                   | 24.4                       | 91.8                       |
| <b>F0-1 vs. F2-4</b>      | 0.582 (0.527-0.637)         | 1880.3                   | 41.2                       | 76.9                       |
| <b>F0-2 vs. F3-4</b>      | 0.538 (0.484-0.591)         | 1811.5                   | 48.9                       | 65.4                       |
| <b>F0-3 vs. F4</b>        | 0.541 (0.481-0.601)         | 1372.1                   | 30.9                       | 89.3                       |

  

| <b>Splenic volume</b> |                             |                          |                            |                            |
|-----------------------|-----------------------------|--------------------------|----------------------------|----------------------------|
| <b>Fibrosis Score</b> | <b>ROC AUC<br/>(95% CI)</b> | <b>Cut-off<br/>Value</b> | <b>Sensitivity<br/>(%)</b> | <b>Specificity<br/>(%)</b> |
| <b>F0 vs. F1-F4</b>   | 0.727 (0.663-0.792)         | 301.8                    | 65.3                       | 72.9                       |
| <b>F0-1 vs. F2-4</b>  | 0.761 (0.716-0.807)         | 312.8                    | 69.4                       | 72.6                       |
| <b>F0-2 vs. F3-4</b>  | 0.819 (0.780-0.859)         | 519.2                    | 59.5                       | 93.8                       |
| <b>F0-3 vs. F4</b>    | 0.847 (0.807-0.886)         | 512.4                    | 72.0                       | 87.0                       |

  

| <b>LSN Score</b>      |                             |                          |                            |                            |
|-----------------------|-----------------------------|--------------------------|----------------------------|----------------------------|
| <b>Fibrosis Score</b> | <b>ROC AUC<br/>(95% CI)</b> | <b>Cut-off<br/>Value</b> | <b>Sensitivity<br/>(%)</b> | <b>Specificity<br/>(%)</b> |
| <b>F0 vs. F1-F4</b>   | 0.782 (0.732-0.832)         | 2.75                     | 55.2                       | 97.7                       |
| <b>F0-1 vs. F2-4</b>  | 0.825 (0.786-0.864)         | 2.65                     | 67.1                       | 88.8                       |
| <b>F0-2 vs. F3-4</b>  | 0.872 (0.837-0.907)         | 2.75                     | 79.8                       | 86.2                       |
| <b>F0-3 vs. F4</b>    | 0.920 (0.892-0.947)         | 2.85                     | 89.8                       | 83.9                       |

**Periportal Space (PPS)**

| <b>Fibrosis Score</b> | <b>ROC AUC<br/>(95% CI)</b> | <b>Cut-off<br/>Value</b> | <b>Sensitivity<br/>(%)</b> | <b>Specificity<br/>(%)</b> |
|-----------------------|-----------------------------|--------------------------|----------------------------|----------------------------|
| <b>F0 vs. F1-F4</b>   | 0.679 (0.600-0.758)         | 5.50                     | 73.7                       | 57.1                       |
| <b>F0-1 vs. F2-4</b>  | 0.689 (0.633-0.745)         | 6.50                     | 68.1                       | 64.3                       |
| <b>F0-2 vs. F3-4</b>  | 0.695 (0.645-0.745)         | 6.50                     | 74.9                       | 56.7                       |
| <b>F0-3 vs. F4</b>    | 0.727 (0.679-0.776)         | 6.50                     | 82.0                       | 53.1                       |

#### LPV/RPV Ratio

| <b>Fibrosis Score</b> | <b>ROC AUC<br/>(95% CI)</b> | <b>Cut-off<br/>Value</b> | <b>Sensitivity<br/>(%)</b> | <b>Specificity<br/>(%)</b> |
|-----------------------|-----------------------------|--------------------------|----------------------------|----------------------------|
| <b>F0 vs. F1-F4</b>   | 0.540 (0.461-0.619)         | 0.95                     | 39.8                       | 71.4                       |
| <b>F0-1 vs. F2-4</b>  | 0.534 (0.475-0.592)         | 0.95                     | 41.2                       | 68.7                       |
| <b>F0-2 vs. F3-4</b>  | 0.541 (0.487-0.595)         | 1.05                     | 23.9                       | 85.7                       |
| <b>F0-3 vs. F4</b>    | 0.560 (0.502-0.618)         | 1.05                     | 25.7                       | 84.4                       |

#### Texture (Mean<sub>PV2</sub>)

| <b>Fibrosis Score</b> | <b>ROC AUC<br/>(95% CI)</b> | <b>Cut-off<br/>Value</b> | <b>Sensitivity<br/>(%)</b> | <b>Specificity<br/>(%)</b> |
|-----------------------|-----------------------------|--------------------------|----------------------------|----------------------------|
| <b>F0 vs. F1-F4</b>   | 0.805 (0.754-0.855)         | 0.25                     | 65.2                       | 91.5                       |
| <b>F0-1 vs. F2-4</b>  | 0.774 (0.725-0.822)         | 0.25                     | 70.6                       | 74.5                       |
| <b>F0-2 vs. F3-4</b>  | 0.802 (0.762-0.843)         | 0.25                     | 81.7                       | 65.2                       |
| <b>F0-3 vs. F4</b>    | 0.844 (0.806-0.883)         | 0.45                     | 73.3                       | 81.2                       |

#### Texture (Skew<sub>PV6</sub>)

| <b>Fibrosis Score</b> | <b>ROC AUC<br/>(95% CI)</b> | <b>Cut-off<br/>Value</b> | <b>Sensitivity<br/>(%)</b> | <b>Specificity<br/>(%)</b> |
|-----------------------|-----------------------------|--------------------------|----------------------------|----------------------------|
| <b>F0 vs. F1-F4</b>   | 0.498 (0.409-0.586)         | 1.55                     | 54.9                       | 53.2                       |
| <b>F0-1 vs. F2-4</b>  | 0.595 (0.535-0.655)         | 1.55                     | 59.2                       | 60.9                       |
| <b>F0-2 vs. F3-4</b>  | 0.628 (0.575-0.682)         | 1.35                     | 56.2                       | 69.1                       |
| <b>F0-3 vs. F4</b>    | 0.668 (0.613-0.724)         | 1.45                     | 72.0                       | 62.7                       |

#### Texture (Kurt<sub>PV6</sub>)

| <b>Fibrosis Score</b> | <b>ROC AUC<br/>(95% CI)</b> | <b>Cut-off<br/>Value</b> | <b>Sensitivity<br/>(%)</b> | <b>Specificity<br/>(%)</b> |
|-----------------------|-----------------------------|--------------------------|----------------------------|----------------------------|
|-----------------------|-----------------------------|--------------------------|----------------------------|----------------------------|

|                      |                     |      |      |      |
|----------------------|---------------------|------|------|------|
| <b>F0 vs. F1-F4</b>  | 0.585 (0.509-0.660) | 3.05 | 29.0 | 97.9 |
| <b>F0-1 vs. F2-4</b> | 0.554 (0.494-0.614) | 1.55 | 51.3 | 63.6 |
| <b>F0-2 vs. F3-4</b> | 0.627 (0.574-0.680) | 1.55 | 58.9 | 64.7 |
| <b>F0-3 vs. F4</b>   | 0.683 (0.631-0.735) | 1.45 | 64.7 | 67.4 |

#### APRI

| <b>Fibrosis Score</b> | <b>ROC AUC<br/>(95% CI)</b> | <b>Cut-off<br/>Value</b> | <b>Sensitivity<br/>(%)</b> | <b>Specificity<br/>(%)</b> |
|-----------------------|-----------------------------|--------------------------|----------------------------|----------------------------|
| <b>F0 vs. F1-F4</b>   | 0.690 (0.630-0.750)         | 0.85                     | 55.0                       | 81.6                       |
| <b>F0-1 vs. F2-4</b>  | 0.720 (0.670-0.769)         | 0.95                     | 57.7                       | 80.0                       |
| <b>F0-2 vs. F3-4</b>  | 0.773 (0.730-0.817)         | 0.95                     | 69.8                       | 76.9                       |
| <b>F0-3 vs. F4</b>    | 0.827 (0.787-0.867)         | 0.95                     | 82.6                       | 72.2                       |

#### FIB-4

| <b>Fibrosis Score</b> | <b>ROC AUC<br/>(95% CI)</b> | <b>Cut-off<br/>Value</b> | <b>Sensitivity<br/>(%)</b> | <b>Specificity<br/>(%)</b> |
|-----------------------|-----------------------------|--------------------------|----------------------------|----------------------------|
| <b>F0 vs. F1-F4</b>   | 0.826 (0.775-0.878)         | 1.65                     | 67.4                       | 87.0                       |
| <b>F0-1 vs. F2-4</b>  | 0.838 (0.795-0.881)         | 1.45                     | 79.6                       | 73.1                       |
| <b>F0-2 vs. F3-4</b>  | 0.857 (0.821-0.893)         | 2.05                     | 79.5                       | 77.0                       |
| <b>F0-3 vs. F4</b>    | 0.894 (0.863-0.924)         | 3.15                     | 82.0                       | 82.4                       |

\* F0-1 vs. F2-4 refers to significant fibrosis and F0-2 vs. F3-4 refers to advanced fibrosis
